# Supplementary material
Source: PubMed Central journal article supplement (PMC341745)

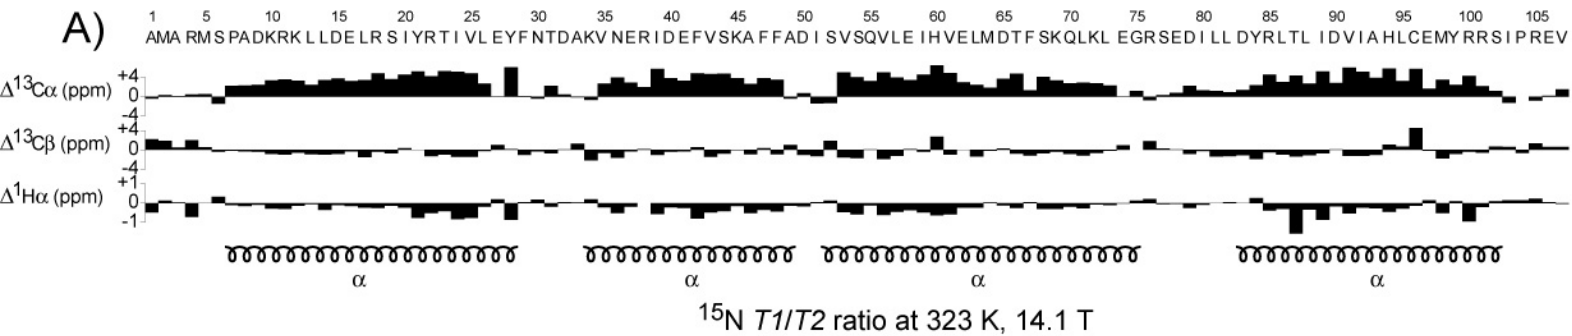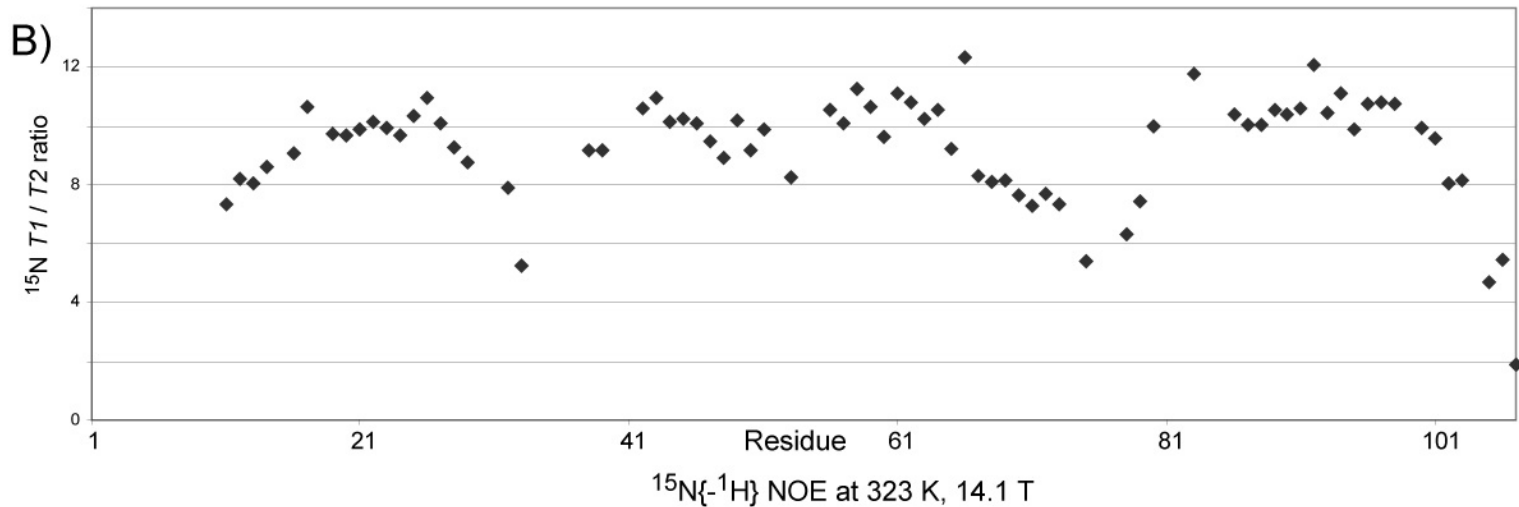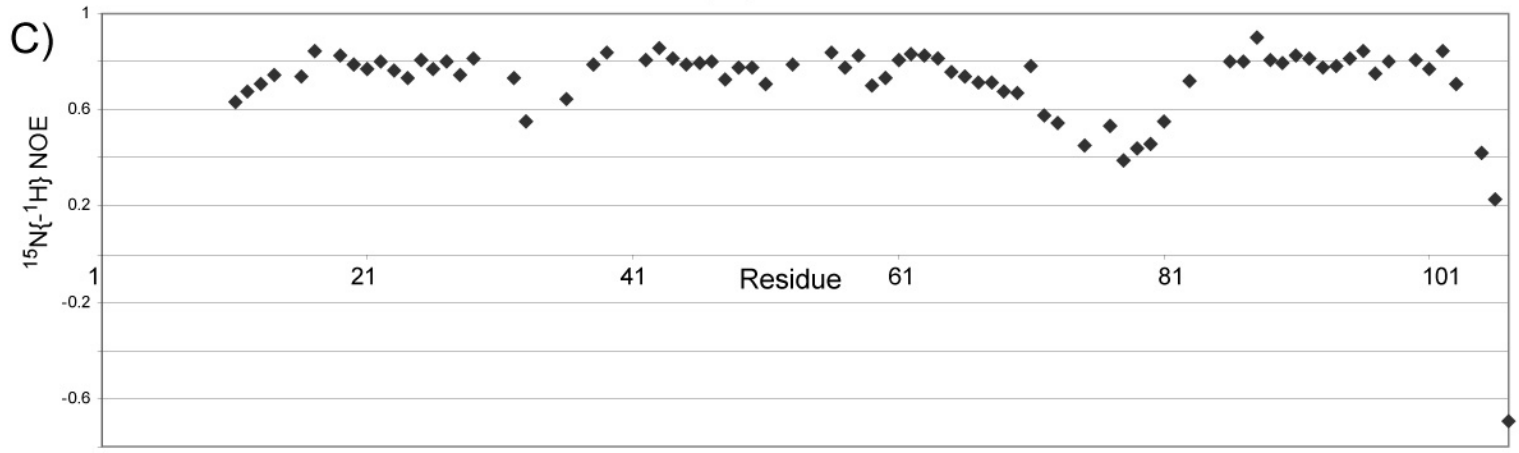

Supplement: pnas_0305516101_7.pdf [file pnas_0305516101_7.pdf]
